# Simulated attack reveals how lesions affect network properties in post-stroke aphasia

John D. Medaglia<sup>1,2,3\*</sup>, Brian A. Erickson<sup>1</sup>, Dorian Pustina<sup>4</sup>,  
Apoorva S. Kelkar<sup>1</sup>, Andrew T. DeMarco<sup>5</sup>,  
J. Vivian Dickens<sup>5</sup>, Peter E. Turkeltaub<sup>5,6</sup>

<sup>1</sup>Department of Psychology, Drexel University  
Philadelphia, PA, 19104, USA

<sup>2</sup>Department of Neurology, Drexel University  
Philadelphia, PA, 19104, USA

<sup>3</sup>Department of Neurology, Perelman School of Medicine, University of Pennsylvania  
Philadelphia, PA, 19104, USA

<sup>4</sup>CHDI Foundation  
Princeton, NJ, 08540, USA

<sup>5</sup>Department of Neurology, Georgetown University  
Washington, DC, 20007, USA

<sup>6</sup>MedStar National Rehabilitation Hospital  
Washington, DC, 20007, USA

\* To whom correspondence should be addressed: [johnmedaglia@gmail.com](mailto:johnmedaglia@gmail.com)

June 5, 2021

## 1 **Abstract**

2 Aphasia is one of the most prevalent cognitive syndromes caused by stroke. The rarity of pre-  
3 morbid imaging and heterogeneity of lesion size and extent obfuscates the links between the  
4 local effects of the lesion, global anatomical network organization, and aphasia symptoms. We  
5 applied a simulated attack approach to examine the effects of 39 stroke lesions on network  
6 topology by simulating their effects in a control sample of 36 healthy brain networks. We fo-  
7 cused on measures of global network organization thought to support overall brain function  
8 and resilience in the whole brain and within the left hemisphere. After removing lesion vol-  
9 ume from the network topology measures and behavioral scores (the Western Aphasia Battery  
10 Aphasia Quotient; WAB-AQ), four behavioral factor scores obtained from a neuropsychologi-  
11 cal battery, and a factor sum), we compared the behavioral variance accounted for by simulated  
12 post-stroke connectomes to that observed in the randomly permuted data. Overall, global mea-  
13 sures of network topology in the whole brain and left hemisphere accounted for 10% variance  
14 or more of the WAB-AQ and the lexical factor score beyond lesion volume and null permu-  
15 tations. Streamline networks provided more reliable point estimates than FA networks. Edge  
16 weights and network efficiency were weighted most highly in predicting the WAB-AQ for FA  
17 networks. Overall, our results suggest that global network measures can provide modest sta-  
18 tistical value predicting overall aphasia severity, but less value in predicting specific behaviors.  
19 Variability in estimates could be induced by premorbid ability, deafferentation and diaschisis,  
20 and neuroplasticity following stroke.

## 21 **Author Contributions**

22 JDM analyzed the data and wrote the manuscript. ASK preprocessed the data and contributed  
23 to manuscript writing. PET provided the data, project oversight, and contributed to project  
24 conceptualization.

## 25 Introduction

26 Aphasia is one of the primary cognitive symptoms following left hemispheric strokes, affecting  
27 180,000 new individuals a year in the United States [1]. Despite decades of research, the brain  
28 basis of aphasia outcomes and recovery remain only partially understood. The majority of  
29 stroke research has focused on the relationship between the regional anatomical influences of  
30 stroke on cognitive symptoms and outcomes [2, 3, 4, 5]. More recently, investigators have  
31 studied the relationships between individual anatomical tracts, the topology of complex brain  
32 networks (the *connectome*, [6, 7, 8, 9]), and behavior [10, 11, 12, 13, 14].

33 Post-stroke, the remaining neuroanatomy maintains cognition and supports recovery. Anatom-  
34 ical network connectivity in the lost and residual (spared) connectome after stroke is related to  
35 behavior [15, 16, 17, 12, 18, 19, 20, 14]. In particular, single-connection analyses have demon-  
36 strated that regions with links to classical *hub* regions such as the temporoparietal junction are  
37 crucial for overall language function assessed with clinical measures [14]. Strokes that directly  
38 impact network hubs disproportionately lead to global cognitive deficits post-stroke on tasks  
39 that place significant semantic or language-production demands on patients [21]. In addition,  
40 cognitive outcomes are associated with the preservation of the brain’s modular configuration  
41 – the tendency for brain regions to group into well-connected clusters [22, 23]. Overall, these  
42 findings suggest that the role of single regions and their connections in network topology, as  
43 well as overall network topology, are related to stroke symptomatology.

44 A primary difficulty in assessing stroke-induced effects on network topology is that re-  
45 searchers often lack premorbid data within-subjects, leading them to rely on cross-sectional  
46 analyses. This results in a reference problem for each stroke. Lesions occur within a single  
47 subject, but the consequences of the lesion interact with other factors about the individual, such  
48 as their development, demographics, and brain organization. As a complement to observing  
49 the consequences of stroke and other types of brain injury, “simulated attack” models are com-  
50 putational approaches that apply virtual damage to the brain and measure their putative conse-  
51 quences [24, 25]. These models can be used to systematically quantify the influences of damage  
52 to regions and connections on brain network organization. After simulating damage, hypothe-  
53 ses about network robustness, cognitive resilience, and recovery can be tested in the residual  
54 connectomes [26]. Measures characterizing the disconnectivity of circuits and networks [12],  
55 the overall efficiency of the network [27, 28, 29], and the balance between local and distributed  
56 processing (*small-worldness*, [30]) could relate to behavioral performance. In addition, the de-  
57 viation in these properties from that expected in a comparison model of healthy subjects might  
58 also characterize variation in resilience to cognitive decline.

59 To examine these possibilities in aphasia severity, we used probabilistic diffusion tractog-  
60 raphy to create anatomical connectomes in 39 subjects with left-hemispheric strokes. Then, we  
61 computed measures that quantify five network properties of anatomical connectivity post-stroke  
62 thought to be related to the integrity of observed topology. Using a simulated attack model, we  
63 computed the effects of each stroke’s specific pattern of connection losses to quantify its ef-  
64 fects on the whole brain and intra-left hemisphere connections in a sample of healthy subjects.

65 Then, we computed models estimating the behavioral variance measured with clinical language  
66 measures accounted for by simulated anatomical network measures. This technique allowed us  
67 to obtain confidence intervals for the strength of brain-behavior relationships between lesioned  
68 network topology and behavior. Above and beyond lesion volume, we hypothesized that to-  
69 tal edge weights, network modularity, global shortest path length, higher local clustering, and  
70 small-worldness would be related to better language performance. We further hypothesized  
71 that the global network measures would be more related to global measures of the severity  
72 of language deficits than factor scores representing specific lexical, auditory comprehension,  
73 phonology, and cognitive/semantic deficits.

## 74 **Methods**

### 75 **Subjects**

76 Data on 61 stroke patients and 37 healthy controls were collected. Twelve patients were ex-  
77 cluded from analysis due to missing or abnormal neuroimaging data; 7 due to lesions outside  
78 the left hemisphere; one due to missing or at-floor behavioral data; one due to acuteness of  
79 stroke; and one due to non-native English language. We excluded 1 healthy subject due to  
80 inflated region-wise streamline estimation (twice the connectome edge density as any other  
81 subject). After exclusions the final samples consisted of 39 subjects with stroke (mean age =  
82 59.74 , St.D. = 9.17, 16 females) and 36 healthy subjects (mean age = 59.13, St.D. = 13.84, 15  
83 females). All subjects were scanned on a 3T Siemens Magnetom scanner at Georgetown Uni-  
84 versity's Center for Functional and Molecular Imaging (CFMI). Aside from the stroke events  
85 in patients, participants had no history of psychiatric or other neurological condition. Healthy  
86 controls had no history of neurological disease or developmental disorder. Subjects with stroke  
87 had a neurologist confirmed diagnosis of aphasia, a left-hemispheric stroke, and the absence of  
88 a right-hemispheric stroke. The data were collected as part of previous studies conducted in the  
89 Cognitive Recovery Lab at Georgetown University.

90 All procedures were approved in a convened review by Georgetown University's Institu-  
91 tional Review Board and were carried out in accordance with the guidelines of the Institutional  
92 Review Board/Human Subjects Committee, Georgetown University. All participants volun-  
93 teered and provided informed consent in writing prior to data collection.

### 94 **Behavioral Data**

95 The Western Aphasia Battery - Revised [31] was obtained for each individual with stroke. In  
96 addition, participants with stroke performed a broader battery of tasks previously described in  
97 detail [32]. To reduce the scores from the battery, a principal components factor analysis was  
98 performed in SPSS 25 using the individual test scores from the WAB-R and the other battery  
99 tasks on the 59 participants with stroke who were able to provide complete behavioral data.

100 Factor analysis was performed on the correlation matrix, factors were extracted based on the  
101 standard cutoff of eigenvalue  $> 1$ , and Varimax rotation with Kaiser normalization was applied  
102 to achieve orthogonal factors. Consistent with a previously reported factor analysis on a subset  
103 of these participants, the factor analysis revealed 4 factors cumulatively accounting for 83.7% of  
104 variance in the scores that we interpreted to reflect lexical production, auditory comprehension,  
105 phonology, and cognitive & semantic aspects of behavior (see Table 1). Factor scores for each  
106 participant were calculated using the regression method.

**Table 1: Factor loadings for the behavioral data.**

|                                   | <b>Factor I (Lexical Production)</b> | <b>Factor II (Auditory Comprehension)</b> | <b>Factor III (Phonology)</b> | <b>Factor IV (Cognitive/Semantic)</b> |
|-----------------------------------|--------------------------------------|-------------------------------------------|-------------------------------|---------------------------------------|
| Philadelphia Naming Test          | 0.83                                 | 0.24                                      | 0.24                          | 0.26                                  |
| WAB Object Naming                 | 0.79                                 | 0.36                                      | 0.33                          | 0.21                                  |
| Reading Real Words                | 0.77                                 | 0.19                                      | 0.39                          | 0.26                                  |
| Reading word-to-picture matching  | 0.75                                 | 0.39                                      | 0.32                          | 0.11                                  |
| WAB Spontaneous Speech Fluency    | 0.73                                 | 0.41                                      | 0.34                          | 0.18                                  |
| WAB Spontaneous Speech Content    | 0.7                                  | 0.4                                       | 0.31                          | 0.31                                  |
| WAB Responsive Speech             | 0.67                                 | 0.54                                      | 0.33                          | 0.14                                  |
| WAB Repetition                    | 0.57                                 | 0.52                                      | 0.52                          | 0.12                                  |
| WAB Yes/No Questions              | 0.24                                 | 0.86                                      | 0.18                          | 0.03                                  |
| WAB Sequential Commands           | 0.32                                 | 0.68                                      | 0.29                          | 0.32                                  |
| WAB Word Recognition              | 0.42                                 | 0.69                                      | 0.23                          | 0.36                                  |
| WAB Sentence Completion           | 0.58                                 | 0.62                                      | 0.3                           | 0.12                                  |
| Digit Span Forwards               | 0.29                                 | 0.43                                      | 0.76                          | 0.21                                  |
| Digit Span Backwards              | 0.45                                 | 0.16                                      | 0.72                          | 0.31                                  |
| Pseudoword Repetition             | 0.46                                 | 0.45                                      | 0.65                          | 0.01                                  |
| Reading Pseudowords               | 0.5                                  | 0.27                                      | 0.62                          | 0.34                                  |
| Letter Fluency (Total 4 letters)  | 0.58                                 | 0.12                                      | 0.61                          | 0.16                                  |
| Backward Spatial Span             | 0.18                                 | -0.05                                     | 0.32                          | 0.83                                  |
| Pyramids and Palm Trees           | 0.41                                 | 0.13                                      | -0.06                         | 0.8                                   |
| Forward Spatial Span              | -0.12                                | 0.27                                      | 0.41                          | 0.76                                  |
| Auditory Word-to-Picture Matching | 0.51                                 | 0.41                                      | -0.05                         | 0.65                                  |

## 107 **Neuroimaging**

108 Diffusion images were acquired on a Siemens 3.0T Magnetom Trio for all subjects along with  
109 a T1-weighted 1mm resolution MPRAGE anatomical scan at each scanning session as part  
110 of a larger imaging protocol. We used a high-angular resolution diffusion imaging (HARDI)  
111 acquisition scheme with a maximum b-value of 1,100 (80 dirs, 10 b=0; 10 b=300; 60 b = 1100)  
112 and a 2.5mm isotropic voxel size. We used a transversal acquisition of 55 axial slices with  
113 the following parameters: repetition time (TR) = 7.5 s; echo time (TE) = 87 ms; field of view  
114 (FoV) = 240 x 240, 138 mm, matrix = 96, total acquisition time of 10:00. MPRAGE scans were  
115 collected with TR = 1900ms, TE = 2.52ms, 176 sagittal slices with 0.9mm slice thickness, FoV  
116 = 240 x 240, matrix = 256, inversion time (TI) = 900ms and flip angle = 9°, total acquisition  
117 time of 5:34.

118 **Anatomical Image Imputation** We conducted full-brain tractography with techniques that  
119 reduce tractography artifacts. To achieve this, tractography must be constrained anatomically  
120 to seed or terminate streamlines at the grey matter/white matter border [33, 34, 35]. However,  
121 identifying tissue types in stroke cases is problematic because of the abnormal signal intensity  
122 at the gray-white matter border. We resolved the issue by imputing estimates of healthy tissue.

123 We imputed anatomical images in two steps. In step 1, lesioned voxels were identified  
124 using lesion tracings provided by a experienced cognitive neurologist (coauthor PET). We then  
125 flipped the lesioned brain along the left-right plane and registered the flipped brain into onto  
126 the non-flipped brain. Next, we filled the lesioned area with the healthy tissue of the homotopic  
127 contralesional hemisphere. This procedure can leave visible marks of the filled area due to  
128 the sudden change in signal, which may cause artifacts when identifying tissue types. Thus,  
129 we imputed a new brain with highly similar morphological features as the original subject's  
130 brain. The imputation procedure used the morphological structure of the reference image (the  
131 filled brain from step 1) and the voxel values of a set of healthy control images to produce a  
132 new image. Each voxel value in the new image was determined by combining the values from  
133 all the healthy images using ANTs' joint image fusion procedure, where images more similar  
134 around the voxel of interest received more weight (similar to multi-atlas label fusion, [36]). We  
135 conducted a search of the optimal number of healthy brains and the optimal radius of similarity  
136 around each voxel to obtain the best result. We obtained an optimal outcome with 22 healthy  
137 brains and a radius of 1 (i.e., a single layer of voxels around each voxel is used to check the  
138 similarity between images and assign weights to healthy images). We inspected the resulting  
139 imputed image to make sure there were no artifacts; none were found. Importantly, the non-  
140 lesioned gyri and sulci in the original image followed the gyri and sulci of the imputed image  
141 without any visible deviation.

142 We performed all the imputation procedures in ANTs (v. 2.2.0). Before any processing, all  
143 images were skull-stripped (`antsBrainExtraction.sh`), corrected for magnetic field inhomogene-  
144 ity (`N4BiasFieldCorrection`), and denoised with an edge preserving algorithm (`PeronaMalik`,  
145 denoising amount: 0.7, iterations: 10). We added back the lesion mask to the brain mask after  
146 skull-stripping to ensure that the lesion area was included in the imputation. Each imputation  
147 required one registration of the flipped image and 22 registrations of the healthy brains onto  
148 the filled image. We conducted all registrations using the SyN non-linear algorithm [37] with  
149 cost function masking to remove the lesion mask from consideration during the registration  
150 computations [38].

151 **Diffusion Tractography** We used MRtrix3 to process the diffusion data [39]. First, we de-  
152 noised (`dwidenoise -extent 9,9,9`), corrected for motion and eddy currents (`dwipreproc`), and  
153 corrected for field inhomogeneity (`dwibiascorrect`). Then we computed response functions for  
154 multiple tissues using the tissue information available in the DWI data itself (`dwi2response`  
155 `dhollander`). We finally computed the fiber orientation distribution (FOD) with a multi-shell  
156 multi-tissue algorithm (`dwi2fod msmt_csd`).

157 To find the GM/WM tissue, we applied tissue classification on the imputed structural image



158 (5ttgen fsl), and then brought the tissue information into DWI space after registering the original  
159 (lesioned) T1w image of the subject onto the mean b=0 image (antsRegistration in order: trans-  
160 lation, rigid, SyN) and applying the transformations to each tissue type image. We then com-  
161 puted the GM/WM border for use in the next tractography step (5tt2gmwmi). We performed  
162 tractography by seeding 15 million streamlines from the GM/WM border (tckgen algorithm:  
163 iFOD2, step: 1mm, minlength: 10mm, maxlength: 300mm, angle: 45 degrees, backtrack:  
164 crop\_at\_gmwmi). We then filtered the tractogram with the SIFT2 algorithm [40, 41] to de-  
165 crease tractography artifacts. Inter-subject connection density normalization was then achieved  
166 through scalar multiplication of each connectome by the subject’s “proportionality coefficient”  
167 derived by SIFT2, denoted by  $\mu$ , which represents the estimated fiber volume per unit length  
168 contributed by each streamline [41].

169 **Network construction** Anatomical scans (imputed in the case of patients) were segmented  
170 using FreeSurfer [42] and parcellated using the connectome mapping toolkit [43]. A parcel-  
171 lation scheme including  $N = 234$  regions was registered to a single b=0 volume from each  
172 subject’s native-space DSI data. The b=0 to MNI voxel mapping produced via Q-Space Dif-  
173 feomorphic Reconstruction (QSDR) was used to map region labels from native space to MNI  
174 coordinates so that individual subject data could be combined and analyzed in a shared standard  
175 space. To extend region labels through the grey-white matter interface, the atlas was dilated by  
176 4mm [44]. Dilation was accomplished by filling non-labeled voxels with the statistical mode  
177 of their neighbors’ labels. In the event of a tie, one of the modes was randomly selected. Each  
178 streamline was labeled according to its terminal region pair. From these data, we constructed  
179 an anatomical connectivity adjacency matrix,  $\mathbf{A}$  whose element  $A_{ij}$  represented the average  
180 fractional anisotropy (FA) of the streamlines connecting that pair of regions [45].

181 To visualize the effects of lesions on parcels in the Lausanne anatomical atlas, we registered  
182 the lesion masks to each individual’s T1 image (the same space as the Lausanne parcel regis-  
183 tration). We computed whether the lesion intersected  $> 0$  voxels in that parcel, and counted the  
184 number of subjects at which that parcel was intersected by the lesion. See Fig. 1 for a visualiza-  
185 tion of the distribution of lesions across subjects and Fig. 2 for a summary of the tractography  
186 pipeline including the imputation.

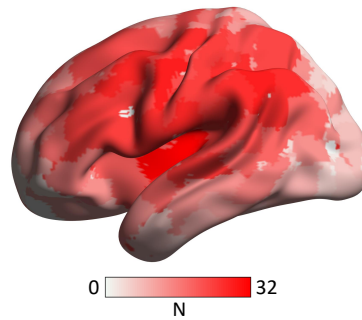

**Figure 1: Distribution of lesioned parcels across subjects with stroke.** Lesions mapped prominently to parcels in left perisylvian regions with decreasing frequency in the superior, inferior, anterior, and posterior directions. The degree of red is proportional to the number of subjects with lesions at that location. N = the number of subjects with a lesion at that parcel label.

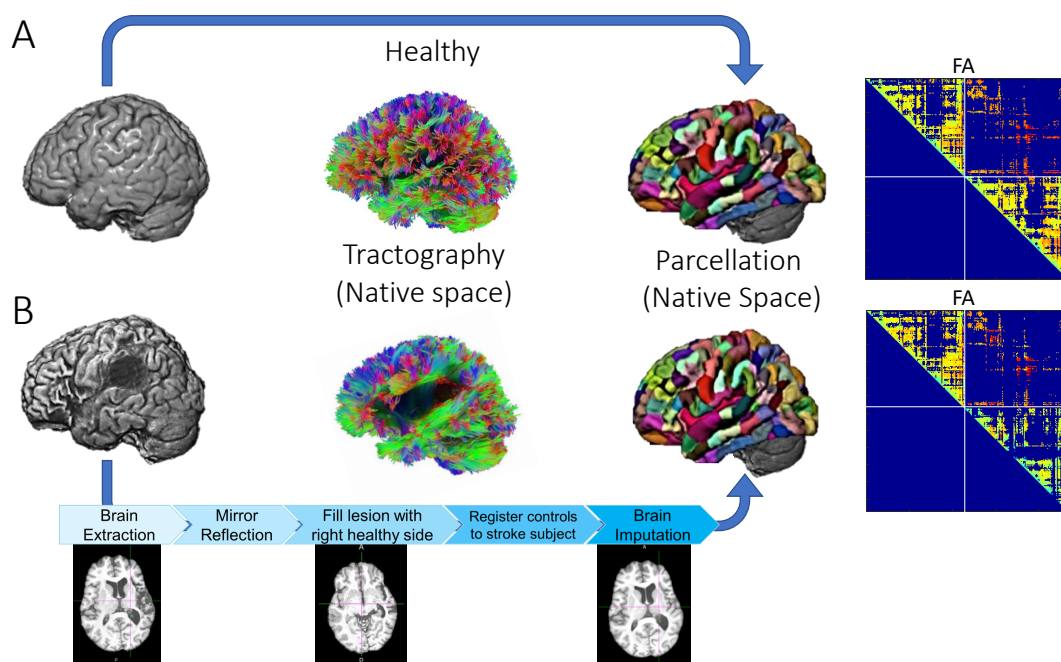

Figure 2: **Schematic of Stroke Imputation and Diffusion Tractography** (A) Processing scheme for healthy subjects. Diffusion tractography was computed in subjects' native space, and the Lausanne multiscale parcellation was fit to subjects' anatomical T1 images. Connectomes were defined as the fractional anisotropy or streamline counts of the edges connecting each region pair and advanced to analyses. (B) The processing scheme for stroke subjects was the same as the healthy subjects with an additional preprocessing step. Specifically, the anatomical T1 image was imputed using the stroke subject's right hemisphere and healthy subjects' data to estimate the pre-lesion T1 anatomical image. The parcellation was computed on this imputed anatomical image to guide connectome extraction through the same regions as the controls.

187 **Connectome Edge Inclusion Mask** Given well-described false positives issues in diffusion  
188 tractography, it is difficult to ensure that every individual streamline is valid in the absence of  
189 ground-truth data [46]. We only permitted edges to participate in our analysis if they were  
190 present in 100% of the healthy control sample. This procedure ensured that any changes in  
191 topology observed in the stroke sample were likely to be driven by lesion-related effects rather  
192 than spurious patterns attributable to unreliable tractography findings between each pair of  
193 parcels. All triangle matrices produced via MRTrix3 were symmetrized across the diagonal  
194 prior to network analyses.

## 195 **Simulated attack**

196 Our goal was to simulate connectome attacks using estimates of the consequences of real strokes  
197 on the connectome relative to the connectivity observed in control subjects. To identify a set  
198 of potentially lesioned edges for each subject, we compared the edge values from each stroke  
199 subject's observed connectome to those observed in healthy subjects. Because the definition of  
200 lesioned tissue depended on a binary threshold, we computed the simulated attacks at thresholds  
201 of 2, 3, and 4 standard deviations below the mean FA or the log of the streamlines (to account  
202 for lognormal edge distributions, see [40, 47, 48, 49]) relative to the the control sample. For  
203 each threshold, a mask was created for all lesioned edges for each stroke subject. Next, we  
204 applied the edge lesion mask to each connectome in the control sample in addition to the same  
205 stroke subject. By applying the mask to the stroke subject, we ensured that the number and  
206 configuration of edges included in the analysis was equal between each stroke subject and the  
207 controls. Finally, each connectome measures was averaged across the thresholds to obtain a  
208 representative value for each subject. Then, an empirical distribution of the expected effects  
209 of lesions on network measures was obtained by computing the network measures (described  
210 below) for each possible control subject-to-lesion pairing.

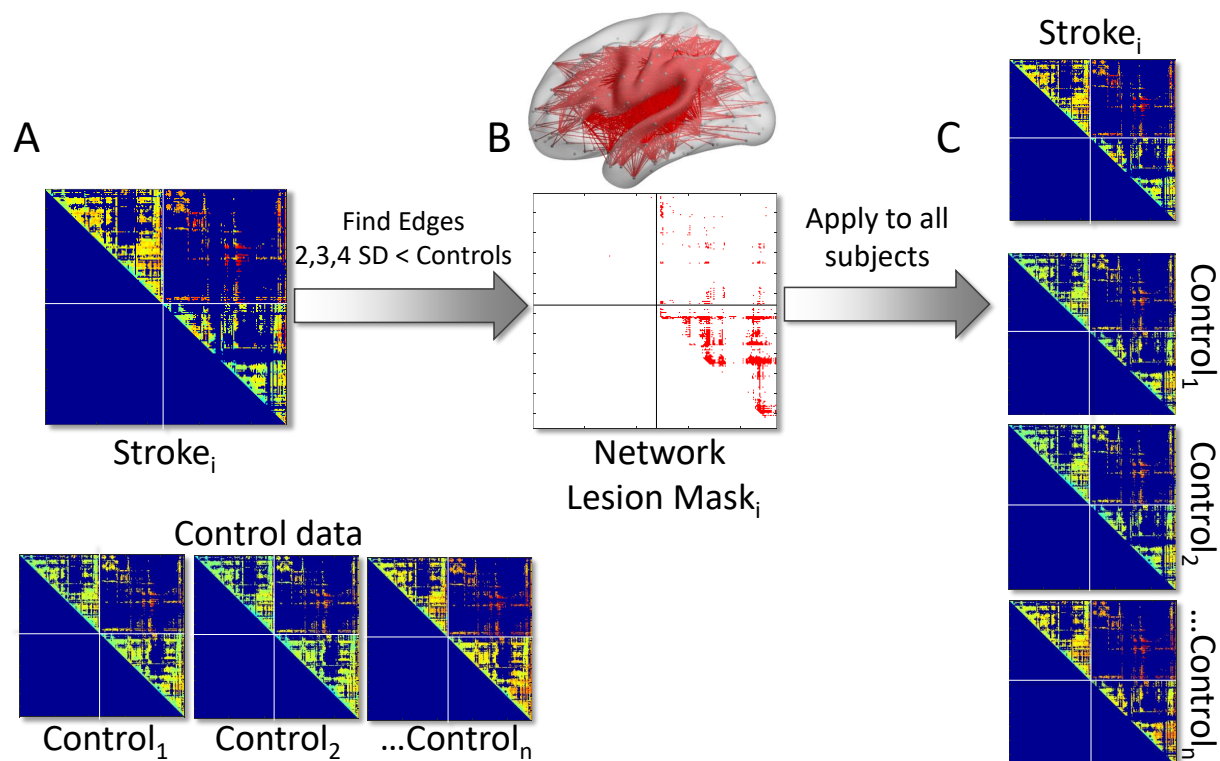

Figure 3: **Schematic of Network Lesion Masking** (A), *Top* Each element  $A_{ij}$  from each subject with aphasia ( $Stroke_i$ ) was compared to (A), *Bottom* the observed values in all control subjects ( $Control_1$  to  $Control_n$ ). (B) The elements with FA 2, 3, or 4 SDs less than controls were labeled as lesioned edges. Then, the lesion mask was applied to the stroke subject and all control subjects, and the resulting networks were advanced to connectomic analyses.

## 211 **Connectome measures**

212 We focused on five *global* network measures that are thought to characterize overall network  
213 communication. We examined (1) the network *edge weights*: the average of observed edge  
214 values, which could be related to overall network intactness and can drive other global net-  
215 work measures. The average edge weight served as a network proxy that estimates the overall  
216 integrity of edges in the residual connectome. We also examined the *modularity* of the net-  
217 works. Modularity is thought to support local computations within tightly-connected subgroups  
218 of nodes within a network [50, 22, 51, 52] and can predict intervention-related cognitive plastic-  
219 ity [53]. It is computed to estimate the relative within-module connectivity of a network relative  
220 to between-module connectivity with the modularity value  $Q$  [54, 55].

221 In addition, we examined another commonly examined characteristics of the overall net-  
222 work topology that have been linked to variability in global cognitive performance. To examine  
223 overall network processing efficiency, we examined (2) network global efficiency [56, 57, 58,  
224 59, 60]. Here, global efficiency is a weighted measure that quantifies average inverse short-  
225 est path length across the connectome for all pairs of nodes [61]. It is inversely related to the  
226 network measure *path length*. A pair of nodes with a short path length are connected by se-  
227 quences of stronger edges. Intuitively, stronger connections between nodes can theoretically  
228 represent the strength of information flow between regions. Thus, the average path length of a  
229 network represents the extent to which all pairs of nodes are associated via short hops through  
230 the network. Accordingly, networks with high global efficiency are thought to have increased  
231 long-distance information processing capacity across all nodes mediated by short paths.

232 In brain networks, local clustering among u-fibers constitute most of the brain's white matter  
233 [62]. Accordingly, short-distance, local clustering is another important aspect of information  
234 processing in brain networks. Therefore, we also examined network (3) transitivity [63, 64, 65].  
235 Transitivity is the ratios of triangles - which are groups of three nodes connected by three non-  
236 zero edges - to all possible triplets (triangles witch edge weights equal to 1). Networks typically  
237 have many more triangles than are triplets. Therefore, greater transitivity means that there are  
238 more local clusters in a network. Networks with high transitivity are thought to have increased  
239 local communication efficiency [66].

240 Finally, healthy brain networks are characterized by an optimal use of available anatomi-  
241 cal connections to support short path lengths and high clustering, which is often referred to as  
242 *small-worldness* [67, 68]. Small-world brain networks are thought to confer many of the pro-  
243 cessing advantages that support diverse and dynamic cognitive functions [30]. To investigate  
244 this property, we used a robust measure of small-worldness, (4) *small-world propensity* (SWP)  
245 [69]. SWP is a weighted metric for small-worldness that accounts for networks of different den-  
246 sities, standardizing the measure against individualized network null models. This technique  
247 makes SWP appropriate for measuring small-worldness in weighted networks by mitigating the  
248 network density-dependence of other measures.

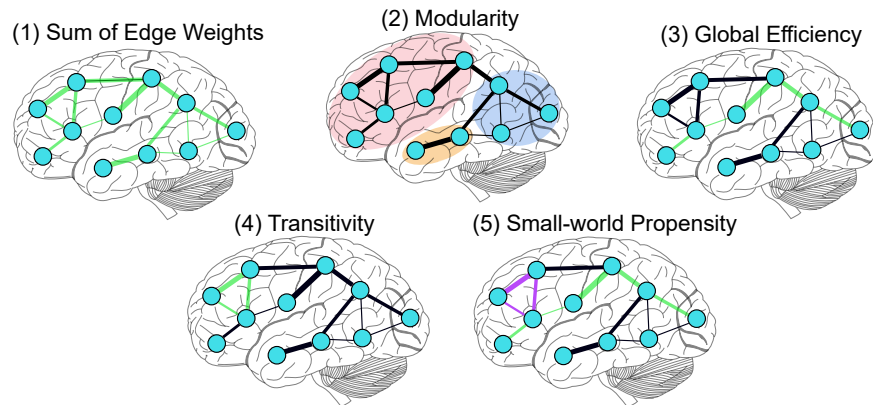

Figure 4: **Schematic of network measures.** Moving left to right from the top: we began with the (1) *average of edge weights* in each network as an overall metric capturing the density of the networks, including any edges lost due to stroke. Then, we examined the additional value of four other measures of topology compared to the sum of edge weights alone. (2) *Modularity*: measures the extent to which nodes in the network are grouped into modules (sometimes, “communities”) as a function of highly-connected nodes. (3) *Global efficiency*: one long path is represented by the set of consecutive edges highlighted in green. (4) *Transitivity*: one possible triplet’s edges are represented in green. (5) *Small-world propensity*: involves a high degree of local clustering (represented by the set of nodes connected by purple edges) and short path lengths (e.g., higher weights along the green path represents a shorter network path between the prefrontal and occipital nodes).

## 249 **Statistical analyses**

250 **The effects of lesions on connectome measures and behavior** First, we examined whether  
251 observed and simulated strokes had significant effects on each network measure in the whole  
252 brain and within the left hemisphere. We computed Welch’s t-tests assuming unequal variances  
253 using Satterthwaite’s approximation for degrees of freedom for each measure against those  
254 observed in the control subjects corrected for multiple comparisons at an alpha level of 0.05.  
255 Then, we used bootstrapping to estimate the proportion of network measure sample means  
256 from the simulated attacks that fell within the range of the observed lesion for each measure.  
257 We used this technique because we intended the simulation to sample from all lesion-control  
258 subject pairs to yield a distribution of possible lesion profiles in a much larger simulated sample.  
259 Specifically, we performed 10,000 resamplings with replacement of 40 subjects and quantified  
260 the proportion of simulated attack sample means for each network measure (FA and streamline)  
261 and each size network (whole brain or left hemisphere). Finally, to estimate the behavioral  
262 variance accounted for by lesion volumes, we fit separate linear regression models using lesion  
263 volume as an independent variable and either WAB-AQ, the factor sum score, or each behavioral  
264 factor score corrected for multiple comparisons at an alpha level of 0.05.

265 **Preparing network measures to identify behavioral variance beyond lesion volume** Our  
266 objective was to obtain and present an empirical estimate for the full range of possible lesion-  
267 behavior relationships observed in the real, simulated, and null analyses.

268 For all connectome analyses, we were interested in the total variance accounted for using  
269 all five network measures for the observed and simulated data. Prior to analyses, we tested the  
270 network measures for violations of normality with the Kolmogorov-Smirnov test. To correct  
271 for skewed distributions in the observed statistics, we used a log-transformation for global ef-  
272 ficiency and SWP. In the simulated attack statistics, we observed negative values and skew for  
273 each statistic; thus, we added a constant value of 1 to each measure prior to a log-transformation.  
274 Finally, network measures were standardized using z-scores prior to all analyses.

275 To test the hypothesis that real and simulated measures of network topology were related  
276 behavioral scores beyond lesion volume, we first computed separate linear regressions with  
277 using stroke subject's lesion volume as the independent variable and each behavioral scale as  
278 the dependent variable. Then, we used the residualized behavioral scores as the dependent  
279 variable for all connectome-behavior analyses. We performed the same procedure for each  
280 network measure to mitigate any remaining influences of lesion volume effects.

281 **Network-behavior relationships in observed, simulated, and null regression models** Next,  
282 all analyses associating network measures with behavioral scores were performed using linear  
283 regression in R statistical software [70]. Our simulated attacks broke the relationship between  
284 stroke subjects and behavior by randomly sampling residual anatomical connectomes after sim-  
285 ulating strokes in control subjects, but preserved the relationship between each behavioral score  
286 and simulated lesion. The null model completely randomized the relationships between simu-  
287 lated lesions and behaviors.

288 Specifically, we computed linear regression models for (1) the observed stroke network  
289 topology, (2) the simulated stroke network topology (10,000 permutations per lesion edge  
290 threshold), and (3) a randomized shuffling of all simulated network measures against the be-  
291 havior (10,000 permutations per lesion edge threshold). We examined the effects of observed  
292 and simulated lesions on each of the topological measures in the whole brain and within intra-  
293 left hemisphere connectomes (i.e., only the whole-brain connectomes included interhemispheric  
294 and right-hemispheric fibers). Then, we computed the relationships between network measures  
295 and the behavioral scores for the whole brain and intra-left hemisphere connectomes.

296 In analyses of the observed data (i.e., data from subjects with real strokes), we used each  
297 of the five network measures as independent variables (z-scored across subjects) and each be-  
298 havioral score as a dependent variable (raw WAB scores, the factor sum scores, or one of the  
299 four behavioral factor scores) in separate linear regression models. Because the network mea-  
300 sures and behavioral scores were the residuals obtained after regressing out the influence of  
301 lesion volume, we obtained specific parameter estimates for each network measure and the total  
302 variance accounted for in the models ( $R^2$  value) beyond lesion volume.

303 To obtain estimates for network-behavior relationships in the simulated attack, we computed  
304 the linear regression models with the same dependent behavioral variables, but with independent



305 network variables sampled from the control-lesion pairings for the simulated attack (z-scored  
306 across subjects). Specifically, in 10,000 permutations, we randomly assigned each stroke lesion  
307 to a healthy brain from the control sample while preserving the link between that lesion and  
308 the behavioral outcome. We then computed each network measure on that sample of simulated  
309 attacks, and fit a regression model. Across the 10,000 models, this approach provided a full  
310 representation of the absolute minimum, maximum, and of the predictive value ( $R^2$ ) of the  
311 anatomical connectomes beyond lesion volume. In addition, we obtained the range of beta  
312 weights for each network measure in the simulations to reveal their relative contributions to the  
313 prediction.

314 In high-dimensional data analyses such as these, it is often helpful to have an empirical  
315 null distribution to contextualize the models of interest. By fully randomizing the relationships  
316 between the simulated and network measures and behavior (i.e., breaking the lesion-behavior  
317 pairing in the simulated strokes), we were able to create a distribution of the expected variance  
318 accounted for ( $R^2$ ) if the data were to be completely randomized. In this kind of null permuta-  
319 tion analysis, we would expect that models could trivially account for more variance than 0 by  
320 chance. Further, the null could include permutations equaling or similar to real lesion-behavior  
321 network pairings, potentially meeting or exceeding the variances obtained from the observed or  
322 simulated attack. If the observed or simulated models exhibited effects that were higher than the  
323 null's central tendency, it would increase our confidence that the network topology across the  
324 range of simulated attack outcomes is non-trivially related to behavior above and beyond lesion  
325 volumes.

326 Our primary goal was to test whether the simulated attacks based on observed lesions dif-  
327 fered from the null distribution. After computing the  $R^2$  value for each null and simulated model  
328 in each permutation, we used a 2 (simulated *versus* null) x 6 (behavioral variables) ANOVA to  
329 test the effects of (1) the simulated attack relative to the null permutations and (2) behavioral  
330 domain on the estimated  $R^2$  values.

## 331 Results

332 **The effects of lesions on network measures.** The observed strokes influenced network topol-  
333 ogy for each measure. In FA networks in the whole brain, we observed a reduction in mean edge  
334 weight, network efficiency, and increased SWP. In the left hemisphere, we observed all of these  
335 effects in addition to reduced modularity (see Fig. 5). In the streamline networks in the whole  
336 brain, we observed reduced mean edge weight, network efficiency, and transitivity as well as  
337 increased modularity. In the left hemisphere, we observed reduced edge weights, modular-  
338 ity and increased transitivity (see Fig. 5, Table 2). The network measures from the simulated  
339 strokes were similar to those observed after real strokes (see Table 3), suggesting that they were  
340 reasonable approximations of stroke effects on the connectomes.

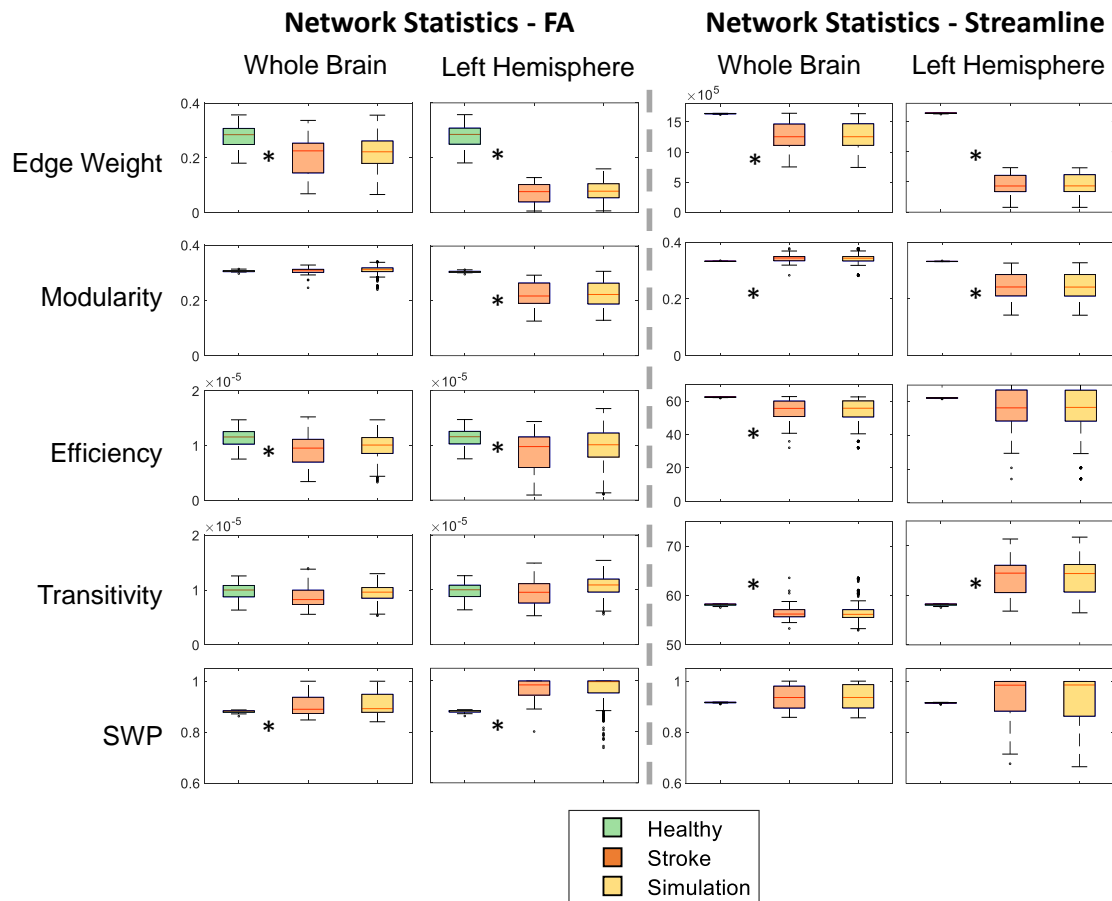

**Figure 5: The effects of stroke on network measures in observed and simulated attack connectomes.** The leftmost column of each plot facet shows the network statistic observed in controls, followed by that observed in strokes, then the simulated attacks. Network measures are presented in their raw (untransformed) values prior to inclusion in network-behavior analyses. Asterisks indicate a significant Welch's two-sample t-test between the control and stroke network measures at  $p < 0.001$  (a stringent threshold after Bonferroni correction for 40 total tests in FA and Streamline data). The top and bottom edges of the boxes represent the 25th and 75th percentiles, respectively. SWP = small world propensity.

341 **Table 2: Two-samples t-tests assuming unequal variances comparing network mea-**  
 342 **asures between the control and stroke samples for the whole brain FA networks (df = Sat-**  
**terthwaite’s approximation for samples with unequal variances).**

|                        | FA             |          |           |          | Streamlines    |          |           |          |
|------------------------|----------------|----------|-----------|----------|----------------|----------|-----------|----------|
|                        | <i>Measure</i> | <i>t</i> | <i>df</i> | <i>p</i> | <i>Measure</i> | <i>t</i> | <i>df</i> | <i>p</i> |
| <b>Whole Brain</b>     | Edge Weights   | 5.74     | 63        | <0.001   | Edge Weights   | 10.55    | 38        | <0.001   |
|                        | Modularity     | 0.39     | 42        | 0.699    | Modularity     | -3.71    | 38        | <0.001   |
|                        | Efficiency     | 4.04     | 62        | <0.001   | Efficiency     | 7.06     | 38        | <0.001   |
|                        | Transitivity   | 2.77     | 70        | 0.007    | Transitivity   | 4.95     | 39        | <0.001   |
|                        | SWP            | -3.69    | 39        | <0.001   | SWP            | -2.78    | 38        | 0.009    |
| <b>Left Hemisphere</b> | Edge Weights   | 23.96    | 68        | <0.001   | Edge Weights   | 46.7     | 38        | <0.001   |
|                        | Modularity     | 11.64    | 38        | <0.001   | Modularity     | 11.47    | 38        | <0.001   |
|                        | Efficiency     | 4.17     | 55        | <0.001   | Efficiency     | 3.08     | 38        | 0.004    |
|                        | Transitivity   | 0.95     | 66        | 0.293    | Transitivity   | -9.11    | 38        | <0.001   |
|                        | SWP            | -6.01    | 38        | <0.001   | SWP            | -0.76    | 38        | 0.445    |

343 **Table 3: The proportion of bootstrap sample means of simulated attacks compared the**  
 344 **range of observed lesion values**  
 345

| Condition                    | Edge Weight | Modularity | Efficiency | Transitivity | SWP  |
|------------------------------|-------------|------------|------------|--------------|------|
| FA - Whole Brain             | 1.00        | 1.00       | 1.00       | 1.00         | 1.00 |
| FA - Left Hemisphere         | 1.00        | 1.00       | 1.00       | 1.00         | 0.77 |
| Streamline - Whole Brain     | 1.00        | 1.00       | 1.00       | 1.00         | 1.00 |
| Streamline - Left Hemisphere | 1.00        | 1.00       | 1.00       | 1.00         | 0.77 |

348 **Relationships between observed and simulated connectome topology and aphasia-related**  
 349 **behaviors.** Lesion volume accounted for approximately 44% of WAB-AQ, 53% of the factor  
 350 sum, and 10-16% of the variance in factor scores (Table 4). In addition, lesion volume was  
 351 negatively correlated with FA network edge weights, modularity, and efficiency, and positively  
 352 associated with small world propensity. Lesion volume was negatively correlated with stream-  
 353 line network edge weights, efficiency, and positively associated with transitivity and small world  
 354 propensity (Table 5).

355

356

**Table 4: The relationships between lesion volume and behavioral scores**

|            | $R^2$ | $F$   | $p$    |
|------------|-------|-------|--------|
| WAB-AQ     | 0.44  | 29.74 | <0.001 |
| Factor Sum | 0.53  | 42.11 | <0.001 |
| Lexical    | 0.16  | 6.97  | 0.012  |
| Auditory   | 0.12  | 4.87  | 0.034  |
| Phonology  | 0.12  | 5.04  | 0.031  |
| Cognitive  | 0.11  | 4.40  | 0.043  |

357

358

359

**Table 5: The relationships between lesion volume and network measures**

*R-values represent Pearson's correlation coefficients between lesion volume and the network*

|           | <i>Measure</i> | $R$   | $p$   |
|-----------|----------------|-------|-------|
| <b>FA</b> | Edge Weights   | -0.52 | 0.001 |
|           | Modularity     | -0.44 | 0.005 |
|           | Efficiency     | -0.46 | 0.003 |
|           | Transitivity   | -0.13 | 0.414 |
|           | SWP            | 0.34  | 0.033 |

|                   |              |       |       |
|-------------------|--------------|-------|-------|
| <b>Streamline</b> | Edge Weights | -0.87 | 0.000 |
|                   | Modularity   | -0.21 | 0.201 |
|                   | Efficiency   | -0.89 | 0.000 |
|                   | Transitivity | 0.55  | 0.000 |
|                   | SWP          | 0.31  | 0.051 |

360

361 *measure.*

362

363

364

365

366

367

We regressed lesion volume from the behavioral and network data to obtain the additional unique variance between the network measures and behavior. The full model results are presented in Fig. 6. For each of the FA and streamline whole brain and intra-left hemisphere networks, the variance accounted for ( $R^2$ ) by the simulated attack networks was greater than the nulls in the omnibus ANOVA (see Table 6 for condition-wise marginal means, which quantify

368 the difference in the observed *versus* the null ( $R^2$ ) across behaviors).

369 In addition, there were main effects of behavior on the model  $R^2$  values (see Supplementary  
370 Tables 1-4). The central tendency of the null models revealed that network measures would be  
371 expected to account for nearly 10% of the behavioral variance on global or specific language  
372 performance at random (i.e., when the link between the lesion being simulated and behavioral  
373 score was broken). Outperforming the null, the simulated attack models generally suggested  
374 that about 20% of global aphasia outcomes measured with the WAB-AQ could be accounted  
375 for residual anatomical network topology. Among the language behavioral factor scores, lex-  
376 ical processing exhibited the strongest relationships with network topology, at 20% or more  
377 variance accounted for by the whole brain or left hemisphere network measures. In most cases,  
378 the observed  $R^2$  estimate was within the range estimated in the simulated attacks. Exceptions  
379 were observed in several cases, and more frequently in FA networks, where observed stroke  
380 estimates were outside the simulated estimates for the whole-brain lexical, phonology, and cog-  
381 nitive/semantic factors and the left-hemisphere cognitive/semantic factors.

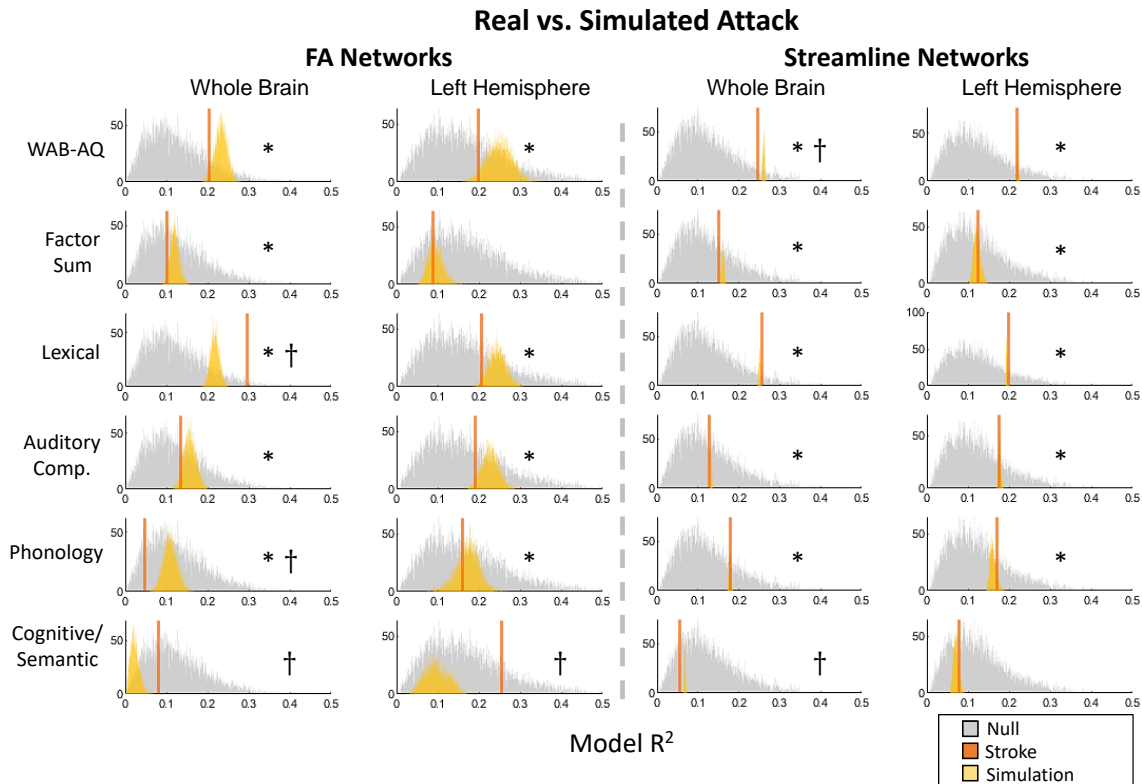

Figure 6: **Network measures and behavioral variance in FA networks.** Each plot facet illustrates histograms of the simulated null, histograms of the simulated attack distributions, and the observed  $R^2$  with solid vertical lines. Asterisks indicate significant  $post hoc$  Welch's one-tailed t-tests assuming unequal variances comparing the  $R^2$  values in the simulated attacks to the null distribution at  $p < 0.001$ . Daggers indicate cases where the observed  $R^2$  value was outside the range obtained in the simulated attack models.

382 **Table 6: Marginal means for the simulated attack relative to the null for FA and**  
383 **streamline networks in the whole brain and left hemisphere**

| Type       | Location | Lower CI | Mean Diff. | Upper CI | p      |
|------------|----------|----------|------------|----------|--------|
| FA         | Whole    | 0.017    | 0.017      | 0.016    | <0.001 |
| FA         | Left     | 0.01     | 0.009      | 0.008    | <0.001 |
| Streamline | Whole    | 0.048    | 0.047      | 0.047    | <0.001 |
| Streamline | Left     | 0.03     | 0.03       | 0.029    | <0.001 |

385 **Beta weights for specific network measures** We additionally obtained the beta values for the  
386 simulated attack models to observe which measures contributed the most weight to model  $R^2$ .  
387 Beta weights for the whole brain and intra-left hemisphere models are illustrated in Figures 7.  
388 In the whole brain models, edge weights and efficiency were most consistently associated with  
389 higher betas across behaviors, with some variation across the individual factor scores. Within  
390 the left hemisphere, edge weights and efficiency remained relatively stronger contributors to  
391 the global WAB and factor score sum behavioral measures. Among the four factor subscores,  
392 network measure beta weights exhibited more variation across specific factors.

393 See Supplementary Table 1 for observed and simulated model betas.

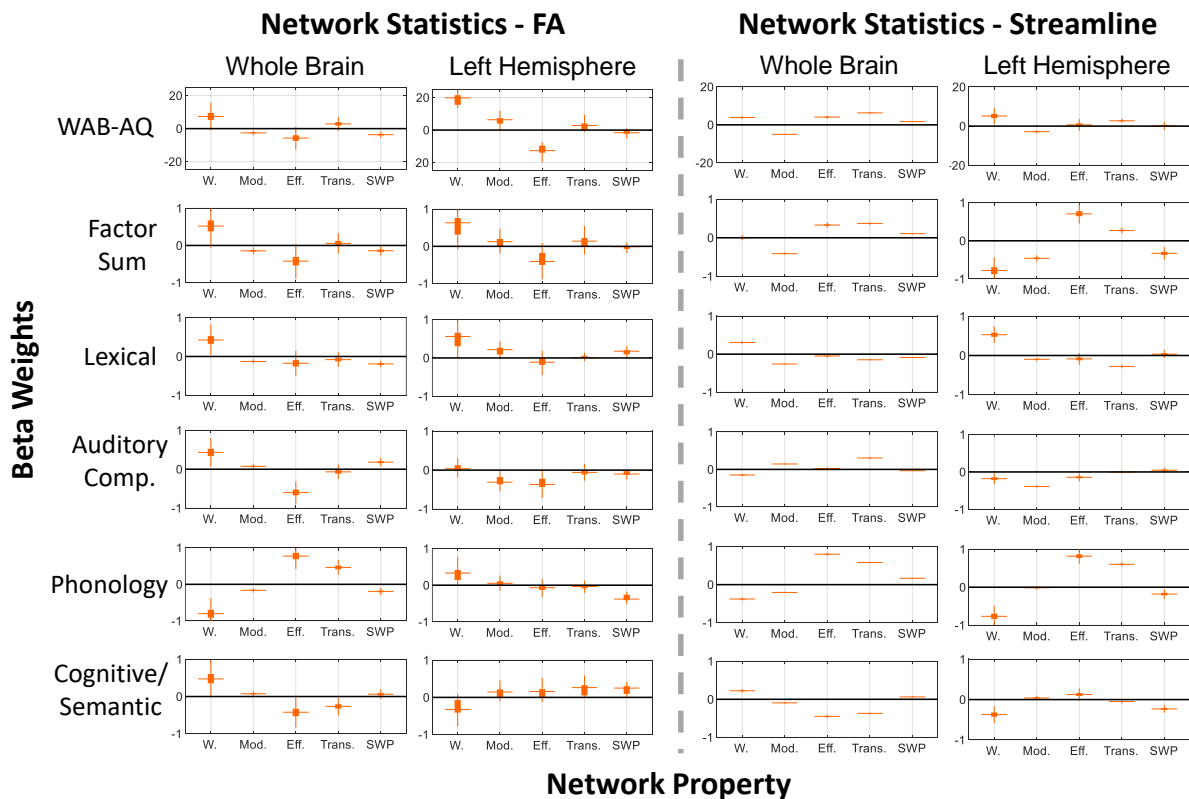

Figure 7: **Simulated attack estimated beta weights for each network measure in FA networks.** Each plot represents the range of betas obtained from the simulated attack models for the network measure. The top and bottom edges of the boxes represent the 25th and 75th percentiles, respectively. W. = edge weights, Mod. = modularity, Eff. = Efficiency, Trans. = Transitivity, SWP = small world propensity.



## 394 Discussion

395 In subjects with left-hemispheric strokes, we used an anatomical network simulated attack anal-  
396 ysis to examine the relationships between topological network measures, a widely used clinical  
397 aphasia outcome measure (the WAB-AQ), and dimensional factor scores of language perfor-  
398 mance. We found that (1) simulating lesions can provide a good approximation of observed  
399 lesion effects on networks that do not suggest widespread network plasticity across people, (2)  
400 that the network properties of the simulated lesions can explain variance in behavior above and  
401 beyond lesion size, (3) that in most cases observed lesions do not explain more variance in be-  
402 havior than simulated lesions, and (4) that relationships of simulated and observed lesions to  
403 behavior differ depending on the behavior being examined.

404 In general, lesions in the left hemisphere disrupted several measures of global topologi-  
405 cal organization in persons with aphasia post-stroke. In whole brain and left hemispheric FA  
406 networks, stroke reduced the overall edge weight and efficiency relative to controls. In con-  
407 trast, small-world propensity tended to increase post-stroke, which recapitulates the reduced  
408 network efficiency compared to relatively consistent measure of global clustering (transitivity)  
409 [69]. Interestingly, modularity was decreased in the intra-hemispheric connectomes. The rela-  
410 tive increases in modularity in the whole brain were likely driven by the absorption of residual  
411 left-hemispheric networks into right hemispheric homotopic communities via interhemispheric  
412 fibers mediated through the corpus callosum. These patterns were similar in the simulated at-  
413 tacks, suggesting that the simulations were reasonable approximations of real stroke effects. A  
414 minority of sampled simulated cases in the left hemisphere had SWP values averaging outside  
415 the range of stroke subjects, potentially reflecting neuroplastic or premorbid differences in the  
416 hemispheric balance between long distance and local communication.

417 As a topic of focus in several previous studies, modularity changes in persons with stroke  
418 could vary based on the location of lesions. For instance, left hemisphere anatomical modular-  
419 ity has been found to increase in subjects with upper limb motor deficits [71], and increased left  
420 hemisphere anatomical modularity have been associated with more severe chronic aphasia [22].  
421 In contrast, reduced modularity in functional connectomes observed in multiple stroke pheno-  
422 types [72] has been shown to partially recover in the transition from the acute to chronic phase  
423 [73, 23, 52]. Anatomical connections and network topology predict region-to-region functional  
424 connectivity [74], and it will be important to clarify how specific lesion distributions interact  
425 with anatomy, and joint anatomy-function relationships. For instance, sensorimotor cortices  
426 are highly interconnected within each hemisphere, and precentral regions are often revealed to  
427 participate in the brain's anatomical hub system [75, 76]. Thus, disrupting sensorimotor regions  
428 and their connections is likely to enhance the modularity of the remaining intra-hemispheric net-  
429 work. Reduced modularity was not as strongly or consistently related to the language behaviors  
430 examined here, suggesting that these topological changes might not be as uniquely informative  
431 as other measures of topology (e.g., especially the overall connections in the network). Over-  
432 all, the topology of the left hemisphere was sparser and more tightly clustered, which is often  
433 thought to limit the general ability for a network to transmit information and reduce the inter-

434 ference between competing demands on the network due to the loss of specialized processing  
435 modules [68].

436 In the simulated attack regression models associating brain network measures with behavior,  
437 we quantified the variance accounted for by anatomical network measures above and beyond  
438 the effects of lesion volume. Unsurprisingly, lesion volume accounted for a moderate amount  
439 of variance in the global aphasia measures (WAB-AQ and factor sum), and less variance in the  
440 specific factor scores. The network measures and behavior residualized for lesion volume re-  
441 vealed that additional variance was accounted for by anatomical network topology. Among the  
442 network-behavior analyses, in most cases, the observed model value was within the simulated  
443 attack distribution, placing the observed  $R^2$  value within a few percent of the central tendency  
444 of the simulated distribution. We did not obtain evidence that the observed brain-behavior rela-  
445 tionships always significantly over- or under-perform estimates from simulated attacks for the  
446 measures we examined. These findings suggest that the majority of brain-behavior relationships  
447 in the simulated permutations are driven by the direct effects of the lesion on the connectome -  
448 i.e., that the simulated attacks were an informative basis to obtain confidence intervals for the  
449 effects of prototypical lesions on the connectome and behavior. Cases where specific deviations  
450 between the observed and simulated models were observed (e.g., in the FA lexical, phonolog-  
451 ical, and semantic factors) could reveal the influences of sampling effects, premorbid network  
452 organization and behavior, deafferentiation, diaschisis, adaptive neuroplasticity, or related neu-  
453 rological effects [77].

454 Across the simulations, there was an intuitive relationship between measures of global net-  
455 work topology and overall aphasia severity, accounting for 20 % of the variance on the WAB-  
456 AQ. Interestingly, this network-behavior relationship was stronger than that observed with the  
457 total factor sum score. Within the left hemisphere, this pattern remained, and lexical process-  
458 ing and auditory comprehension tended to have strong relationships with network topology,  
459 potentially reflecting the anatomically distributed demands of these tasks in left hemispheric  
460 perisylvian circuits [78], association regions [79], and sensory-perceptual pathways [80, 81].  
461 Perhaps due to the relatively circumscribed circuits thought to mediate phonological processing  
462 [82, 83] and relatively preserved prefrontal circuitry that might mediate the functions in our  
463 cognitive factor [84, 85], we observed weaker relationships between these behaviors and the  
464 topology in the simulated attacks.

465 Overall, streamline networks appeared to offer substantially more reliable point estimates  
466 for global and dimensional behavioral outcomes despite similar central tendencies to FA net-  
467 works. This could be because our use of a reliable healthy connectome ensured consistent sets of  
468 streamline edges in healthy controls, whereas FA values are derived from estimated streamlines  
469 and offer an additional source of variance in the simulations. In addition, streamline distribu-  
470 tions tend to be heavy-tailed with few highly connected pairs of regions [40, 47, 48, 49] with  
471 node degree (number of connections) and strength (the total weight of the connections) distribu-  
472 tions that follow exponentially-truncated power laws [86, 87]. Lesions induce a significant loss  
473 in the number of estimated fibers, and the measured topology of these losses across subjects  
474 within the reliable healthy connectome will be strongly influenced by the heavy-tailed distri-

475 bution of edges and presence of a subset of high-connection-strength nodes. In contrast, FA is  
476 computed over the estimated streamlines connecting regions pairs regardless of their number,  
477 exhibiting significantly less skew and consequently relatively fewer high-connection-strength  
478 nodes. Qualitatively, FA can represent the integrity of axonal pathways [88, 89], offering a  
479 distinct interpretive value relative to streamlines. However, our results suggest that increased  
480 caution when evaluating the effect sizes of brain-behavior relationships could be advised for FA  
481 relative to streamline connectomes.

482 Across the FA networks, it was not clear that any one of the investigated network measures  
483 uniquely corresponds to a single dimension of language function post-stroke. When examined  
484 using the whole brain FA networks, edge weights and network global efficiency tended to con-  
485 tribute to most of the behavioral measures. This finding could represent the possibility that  
486 individual variation in the myriad nearby, short-distance connections such as u-fibers and direct  
487 connections are relevant to mediating recovery [20, 90]. U-fibers dominate the brain's white  
488 matter but their links to cognition are conspicuously understudied [91]. Intuitively, a higher  
489 degree of intact local bypasses could facilitate adaptations to lost functions in general [92]. It  
490 is likely that as the behavioral measures increase in specificity, the unique edges contributing to  
491 losses in each function vary, driving differences in topology-behavior relationships [14]. In lex-  
492 ical processing (where the models accounted for the most variance among the individual factor  
493 scores) edge weights were most prominently related to behavior for both streamlines and FA,  
494 suggesting that overall loss of connections independent of their relationship with lesion volume  
495 is a key mediator of deficits relative to other topological measures.

496 Several limitations to our work can motivate future studies. We focused on a narrow set of  
497 commonly used network topology measures that characterize some of the aspects of global net-  
498 work organization as an initial benchmark for the connectome bases of language performance.  
499 Numerous other measures are available, but the link between specific network measures and  
500 cognitive functions remains an active area of inquiry and debate [6, 93, 94, 95]. More spe-  
501 cific hypotheses that allow researchers to rule out spurious or non-specific network-behavior  
502 effects, ideally informed by theoretical models, should be a focus of applied network studies. In  
503 addition, other measures that represent connectome edges (streamline density, diffusivity, etc.,  
504 [96, 34, 41]) could be investigated. We recommend that these efforts will be best supported  
505 by collaborative efforts to pool patient samples and test the robustness of brain-behavior rela-  
506 tionships. In addition, we used a well-established anatomical atlas to guide our parcellation  
507 with an imputation procedure to compare healthy and stroke subjects, but numerous atlases  
508 are now available. Given that there is no consensus that a particular atlas is ideal for any spe-  
509 cific purpose [97], we further encourage researchers to collaboratively pool data to examine the  
510 reliability and validity of different processing decisions in anatomical and functional studies  
511 [98, 99, 100, 101, 102, 103].

## 512 **Conclusion**

513 Our simulations revealed that several anatomical connectome measures thought to be related to  
514 global network processing can be expected to account for 10-20% of the variance in language  
515 performance on clinical measures above and beyond lesion volume. Importantly, measures  
516 of whole brain and left hemisphere anatomical connectomes have stronger relationships with  
517 global language function, reflecting an intuitive relationship between network-wide integrity  
518 and overall functioning. More specific measures of anatomical circuits could be necessary to  
519 gain more sensitivity to distinct language processes. Simulated attacks are useful in leveraging  
520 matched comparison samples to obtain confidence estimates for observed effects. Differences  
521 between observed and simulated values could identify the influences of premorbid status, deaf-  
522 ferentation, diaschisis, and neuroplasticity following stroke.

523 **Acknowledgments**

524 JDM acknowledges support from NIH grants DP5-OD-021352, R01-DC-16800, R01-AG-059763,  
525 and Department of the Army grant PRMRP 12902164. PET and JDM acknowledge support  
526 from NIH grant R01-DC014960.

## 527 **References and Notes**

- 528 [1] Ovbiagele B, Nguyen-Huynh MN. Stroke epidemiology: advancing our understanding  
529 of disease mechanism and therapy. *Neurotherapeutics*. 2011;8(3):319.
- 530 [2] Bates E, Wilson SM, Saygin AP, Dick F, Sereno MI, Knight RT, et al. Voxel-based  
531 lesion–symptom mapping. *Nature neuroscience*. 2003;6(5):448–450.
- 532 [3] Meyer S, Kessner SS, Cheng B, Bönstrup M, Schulz R, Hummel FC, et al. Voxel-based  
533 lesion-symptom mapping of stroke lesions underlying somatosensory deficits. *NeuroIm-  
534 age: Clinical*. 2016;10:257–266.
- 535 [4] Mirman D, Thye M. Uncovering the neuroanatomy of core language systems using  
536 lesion-symptom mapping. *Current Directions in Psychological Science*. 2018;27(6):455–  
537 461.
- 538 [5] Rorden C, Karnath HO, Bonilha L. Improving lesion-symptom mapping. *Journal of  
539 cognitive neuroscience*. 2007;19(7):1081–1088.
- 540 [6] Bassett DS, Sporns O. Network neuroscience. *Nature neuroscience*. 2017;20(3):353–  
541 364.
- 542 [7] Hagmann P. From diffusion MRI to brain connectomics. EPFL; 2005.
- 543 [8] Sporns O, Tononi G, Kötter R. The human connectome: a structural description of the  
544 human brain. *PLoS Comput Biol*. 2005;1(4):e42.
- 545 [9] van den Heuvel MP, Sporns O. A cross-disorder connectome landscape of brain dyscon-  
546 nectivity. *Nature reviews neuroscience*. 2019;20(7):435–446.
- 547 [10] Del Gaizo J, Fridriksson J, Yourganov G, Hillis AE, Hickok G, Misisic B, et al. Map-  
548 ping language networks using the structural and dynamic brain connectomes. *Eneuro*.  
549 2017;4(5).
- 550 [11] Fox MD. Mapping symptoms to brain networks with the human connectome. *New  
551 England Journal of Medicine*. 2018;379(23):2237–2245.
- 552 [12] Gleichgerrcht E, Fridriksson J, Rorden C, Bonilha L. Connectome-based lesion-  
553 symptom mapping (CLSM): A novel approach to map neurological function. *NeuroIm-  
554 age: Clinical*. 2017;16:461–467.
- 555 [13] Gollo LL, Roberts JA, Cropley VL, Di Biase MA, Pantelis C, Zalesky A, et al. Fragility  
556 and volatility of structural hubs in the human connectome. *Nature neuroscience*.  
557 2018;21(8):1107–1116.

- 558 [14] Yourganov G, Fridriksson J, Rorden C, Gleichgerrcht E, Bonilha L. Multivariate  
559 connectome-based symptom mapping in post-stroke patients: networks supporting lan-  
560 guage and speech. *Journal of Neuroscience*. 2016;36(25):6668–6679.
- 561 [15] Crofts JJ, Higham DJ, Bosnell R, Jbabdi S, Matthews PM, Behrens T, et al. Network  
562 analysis detects changes in the contralesional hemisphere following stroke. *Neuroimage*.  
563 2011;54(1):161–169.
- 564 [16] Forkel SJ, Thiebaut de Schotten M, Dell’Acqua F, Kalra L, Murphy DG, Williams SC,  
565 et al. Anatomical predictors of aphasia recovery: a tractography study of bilateral peri-  
566 sylvian language networks. *Brain*. 2014;137(7):2027–2039.
- 567 [17] Heller SL, Heier LA, Watts R, Schwartz TH, Zelenko N, Doyle W, et al. Evidence  
568 of cerebral reorganization following perinatal stroke demonstrated with fMRI and DTI  
569 tractography. *Clinical imaging*. 2005;29(4):283–287.
- 570 [18] Kim S, Jang S. Prediction of aphasia outcome using diffusion tensor tractography for  
571 arcuate fasciculus in stroke. *American Journal of Neuroradiology*. 2013;34(4):785–790.
- 572 [19] Kunimatsu A, Aoki S, Masutani Y, Abe O, Mori H, Ohtomo K. Three-dimensional  
573 white matter tractography by diffusion tensor imaging in ischaemic stroke involving the  
574 corticospinal tract. *Neuroradiology*. 2003;45(8):532–535.
- 575 [20] Mukherjee P. Diffusion tensor imaging and fiber tractography in acute stroke. *Neu-  
576 roimaging Clinics*. 2005;15(3):655–665.
- 577 [21] Warren DE, Power JD, Bruss J, Denburg NL, Waldron EJ, Sun H, et al. Network mea-  
578 sures predict neuropsychological outcome after brain injury. *Proceedings of the National  
579 Academy of Sciences*. 2014;111(39):14247–14252.
- 580 [22] Marebwa BK, Fridriksson J, Yourganov G, Feenaughty L, Rorden C, Bonilha L. Chronic  
581 post-stroke aphasia severity is determined by fragmentation of residual white matter net-  
582 works. *Scientific reports*. 2017;7(1):1–13.
- 583 [23] Schlemm E, Schulz R, Bönstrup M, Krawinkel L, Fiehler J, Gerloff C, et al. Structural  
584 brain networks and functional motor outcome after stroke—a prospective cohort study.  
585 *Brain Communications*. 2020;2(1):fcaa001.
- 586 [24] Joyce KE, Hayasaka S, Laurienti PJ. The human functional brain network demon-  
587 strates structural and dynamical resilience to targeted attack. *PLoS Comput Biol*.  
588 2013;9(1):e1002885.
- 589 [25] Kaiser M, Martin R, Andras P, Young MP. Simulation of robustness against lesions of  
590 cortical networks. *European Journal of Neuroscience*. 2007;25(10):3185–3192.

- 591 [26] Aerts H, Fias W, Caeyenberghs K, Marinazzo D. Brain networks under attack: robustness  
592 properties and the impact of lesions. *Brain*. 2016;139(12):3063–3083.
- 593 [27] Ajilore O, Lamar M, Kumar A. Association of brain network efficiency with aging, de-  
594 pression, and cognition. *The American Journal of Geriatric Psychiatry*. 2014;22(2):102–  
595 110.
- 596 [28] Bullmore E, Sporns O. The economy of brain network organization. *Nature Reviews*  
597 *Neuroscience*. 2012;13(5):336–349.
- 598 [29] Van Den Heuvel MP, Stam CJ, Kahn RS, Pol HEH. Efficiency of functional brain net-  
599 works and intellectual performance. *Journal of Neuroscience*. 2009;29(23):7619–7624.
- 600 [30] Bassett DS, Bullmore ET. Small-world brain networks revisited. *The Neuroscientist*.  
601 2017;23(5):499–516.
- 602 [31] Kertesz A. *Western aphasia battery: Revised*. Pearson; 2007.
- 603 [32] Lacey EH, Skipper-Kallal LM, Xing S, Fama ME, Turkeltaub PE. Mapping common  
604 aphasia assessments to underlying cognitive processes and their neural substrates. *Neu-*  
605 *rorehabilitation and Neural Repair*. 2017;31(5):442–450.
- 606 [33] Jeurissen B, Descoteaux M, Mori S, Leemans A. Diffusion MRI fiber tractography of  
607 the brain. *NMR in Biomedicine*. 2019;32(4):e3785.
- 608 [34] Smith RE, Tournier JD, Calamante F, Connelly A. Anatomically-constrained tractogra-  
609 phy: improved diffusion MRI streamlines tractography through effective use of anatom-  
610 ical information. *Neuroimage*. 2012;62(3):1924–1938.
- 611 [35] Song AW, Chang HC, Petty C, Guidon A, Chen NK. Improved delineation of short  
612 cortical association fibers and gray/white matter boundary using whole-brain three-  
613 dimensional diffusion tensor imaging at submillimeter spatial resolution. *Brain con-*  
614 *nectivity*. 2014;4(9):636–640.
- 615 [36] Wang H, Suh JW, Das SR, Pluta JB, Craige C, Yushkevich PA. Multi-atlas segmentation  
616 with joint label fusion. *IEEE transactions on pattern analysis and machine intelligence*.  
617 2012;35(3):611–623.
- 618 [37] Avants BB, Tustison NJ, Song G, Cook PA, Klein A, Gee JC. A reproducible evalua-  
619 tion of ANTs similarity metric performance in brain image registration. *Neuroimage*.  
620 2011;54(3):2033–2044.
- 621 [38] Brett M, Leff AP, Rorden C, Ashburner J. Spatial normalization of brain images with  
622 focal lesions using cost function masking. *Neuroimage*. 2001;14(2):486–500.



- 623 [39] Tournier JD, Smith R, Raffelt D, Tabbara R, Dhollander T, Pietsch M, et al. MRtrix3: A  
624 fast, flexible and open software framework for medical image processing and visualisation.  
625 *NeuroImage*. 2019;202:116137.
- 626 [40] Smith RE, Tournier JD, Calamante F, Connelly A. The effects of SIFT on the  
627 reproducibility and biological accuracy of the structural connectome. *Neuroimage*.  
628 2015;104:253–265.
- 629 [41] Smith RE, Tournier JD, Calamante F, Connelly A. SIFT2: Enabling dense quantitative  
630 assessment of brain white matter connectivity using streamlines tractography. *Neuroim-*  
631 *age*. 2015;119:338–351.
- 632 [42] Fischl B. FreeSurfer. *Neuroimage*. 2012;62(2):774–781.
- 633 [43] Cammoun L, Gigandet X, Meskaldji D, Thiran JP, Sporns O, Do KQ, et al. Mapping the  
634 human connectome at multiple scales with diffusion spectrum MRI. *Journal of neuro-*  
635 *science methods*. 2012;203(2):386–397.
- 636 [44] Cieslak M, Grafton S. Local termination pattern analysis: a tool for comparing white  
637 matter morphology. *Brain imaging and behavior*. 2014;8(2):292–299.
- 638 [45] Hagmann P, Cammoun L, Gigandet X, Meuli R, Honey CJ, Wedeen VJ, et al. Mapping  
639 the structural core of human cerebral cortex. *PLoS Biol*. 2008;6(7):e159.
- 640 [46] Maier-Hein KH, Neher PF, Houde JC, Côté MA, Garyfallidis E, Zhong J, et al. The  
641 challenge of mapping the human connectome based on diffusion tractography. *Nature*  
642 *communications*. 2017;8(1):1–13.
- 643 [47] Yeh CH, Smith RE, Dhollander T, Calamante F, Connelly A. Connectomes from stream-  
644 lines tractography: Assigning streamlines to brain parcellations is not trivial but highly  
645 consequential. *Neuroimage*. 2019;199:160–171.
- 646 [48] Zhang Z, Descoteaux M, Zhang J, Girard G, Chamberland M, Dunson D, et al. Mapping  
647 population-based structural connectomes. *NeuroImage*. 2018;172:130–145.
- 648 [49] Rosen BQ, Halgren E. A whole-cortex probabilistic diffusion tractography connectome.  
649 *Eneuro*. 2021;8(1).
- 650 [50] Alexander-Bloch AF, Gogtay N, Meunier D, Birn R, Clasen L, Lalonde F, et al. Dis-  
651 rupted modularity and local connectivity of brain functional networks in childhood-onset  
652 schizophrenia. *Frontiers in systems neuroscience*. 2010;4:147.
- 653 [51] Meunier D, Lambiotte R, Fornito A, Ersche K, Bullmore ET. Hierarchical modularity in  
654 human brain functional networks. *Frontiers in neuroinformatics*. 2009;3:37.

- 655 [52] Siegel JS, Seitzman BA, Ramsey LE, Ortega M, Gordon EM, Dosenbach NU, et al. Re-  
656 emergence of modular brain networks in stroke recovery. *Cortex*. 2018;101:44–59.
- 657 [53] Gallen CL, D’Esposito M. Brain modularity: a biomarker of intervention-related plas-  
658 ticity. *Trends in cognitive sciences*. 2019;23(4):293–304.
- 659 [54] Leicht EA, Newman ME. Community structure in directed networks. *Physical review*  
660 *letters*. 2008;100(11):118703.
- 661 [55] Reichardt J, Bornholdt S. Statistical mechanics of community detection. *Physical review*  
662 *E*. 2006;74(1):016110.
- 663 [56] Griffa A, Baumann PS, Thiran JP, Hagmann P. Structural connectomics in brain diseases.  
664 *Neuroimage*. 2013;80:515–526.
- 665 [57] Iturria-Medina Y, Sotero RC, Canales-Rodríguez EJ, Alemán-Gómez Y, Melie-García L.  
666 Studying the human brain anatomical network via diffusion-weighted MRI and Graph  
667 Theory. *Neuroimage*. 2008;40(3):1064–1076.
- 668 [58] Lawrence AJ, Chung AW, Morris RG, Markus HS, Barrick TR. Structural network ef-  
669 ficiency is associated with cognitive impairment in small-vessel disease. *Neurology*.  
670 2014;83(4):304–311.
- 671 [59] Beare R, Adamson C, Bellgrove MA, Vilgis V, Vance A, Seal ML, et al. Altered struc-  
672 tural connectivity in ADHD: a network based analysis. *Brain imaging and behavior*.  
673 2017;11(3):846–858.
- 674 [60] Berlot R, Metzler-Baddeley C, Ikram MA, Jones DK, O’Sullivan MJ. Global efficiency  
675 of structural networks mediates cognitive control in mild cognitive impairment. *Frontiers*  
676 *in aging neuroscience*. 2016;8:292.
- 677 [61] Latora V, Marchiori M. Efficient behavior of small-world networks. *Physical review*  
678 *letters*. 2001;87(19):198701.
- 679 [62] Schüz A, Braitenberg V. The human cortical white matter: quantitative aspects of cortico-  
680 cortical long-range connectivity. *Cortical areas: Unity and diversity*. 2002:377–385.
- 681 [63] Lo CYZ, He Y, Lin CP. Graph theoretical analysis of human brain structural networks.  
682 *Reviews in the neurosciences*. 2011;22(5):551–563.
- 683 [64] Llufríu S, Martínez-Heras E, Solana E, Sola-Valls N, Sepulveda M, Blanco Y, et al.  
684 Structural networks involved in attention and executive functions in multiple sclerosis.  
685 *NeuroImage: Clinical*. 2017;13:288–296.

- 686 [65] Prasad G, Nir TM, Toga AW, Thompson PM. Tractography density and network mea-  
687 sures in Alzheimer’s disease. In: 2013 IEEE 10th International Symposium on Biomed-  
688 ical Imaging. IEEE; 2013. p. 692–695.
- 689 [66] Rubinov M, Sporns O. Complex network measures of brain connectivity: uses and inter-  
690 pretations. *Neuroimage*. 2010;52(3):1059–1069.
- 691 [67] Watts DJ, Strogatz SH. Collective dynamics of ‘small-world’ networks. *nature*.  
692 1998;393(6684):440–442.
- 693 [68] Stam CJ. Modern network science of neurological disorders. *Nature Reviews Neuro-*  
694 *science*. 2014;15(10):683–695.
- 695 [69] Muldoon SF, Bridgeford EW, Bassett DS. Small-world propensity and weighted brain  
696 networks. *Scientific reports*. 2016;6:22057.
- 697 [70] Team RC, et al. R: A language and environment for statistical computing. Vienna, Aus-  
698 tria; 2013.
- 699 [71] Cheng B, Schlemm E, Schulz R, Boenstrup M, Messé A, Hilgetag C, et al. Altered topol-  
700 ogy of large-scale structural brain networks in chronic stroke. *Brain Communications*.  
701 2019;1(1):fcz020.
- 702 [72] Corbetta M, Siegel JS, Shulman GL. On the low dimensionality of behavioral deficits and  
703 alterations of brain network connectivity after focal injury. *Cortex*. 2018;107:229–237.
- 704 [73] Lim JS, Kang DW. Stroke connectome and its implications for cognitive and behavioral  
705 sequela of stroke. *Journal of stroke*. 2015;17(3):256.
- 706 [74] Griffis JC, Metcalf NV, Corbetta M, Shulman GL. Damage to the shortest structural paths  
707 between brain regions is associated with disruptions of resting-state functional connec-  
708 tivity after stroke. *NeuroImage*. 2020;210:116589.
- 709 [75] Van Den Heuvel MP, Sporns O. Rich-club organization of the human connectome. *Jour-*  
710 *nal of Neuroscience*. 2011;31(44):15775–15786.
- 711 [76] McColgan P, Seunarine KK, Razi A, Cole JH, Gregory S, Durr A, et al. Selective vulner-  
712 ability of Rich Club brain regions is an organizational principle of structural connectivity  
713 loss in Huntington’s disease. *Brain*. 2015;138(11):3327–3344.
- 714 [77] Turkeltaub PE. A taxonomy of brain–behavior relationships after stroke. *Journal of*  
715 *Speech, Language, and Hearing Research*. 2019;62(11):3907–3922.
- 716 [78] Hickok G, Poeppel D. The cortical organization of speech processing. *Nature reviews*  
717 *neuroscience*. 2007;8(5):393–402.

- 718 [79] Dronkers NF, Wilkins DP, Van Valin Jr RD, Redfern BB, Jaeger JJ. Lesion analysis of  
719 the brain areas involved in language comprehension. *Cognition*. 2004;92(1-2):145–177.
- 720 [80] Desai RH, Binder JR, Conant LL, Seidenberg MS. Activation of sensory–motor areas in  
721 sentence comprehension. *Cerebral Cortex*. 2010;20(2):468–478.
- 722 [81] Friederici AD. The cortical language circuit: from auditory perception to sentence com-  
723 prehension. *Trends in cognitive sciences*. 2012;16(5):262–268.
- 724 [82] Poldrack RA, Wagner AD, Prull MW, Desmond JE, Glover GH, Gabrieli JD. Functional  
725 specialization for semantic and phonological processing in the left inferior prefrontal  
726 cortex. *Neuroimage*. 1999;10(1):15–35.
- 727 [83] Pollack C, Ashby NC. Where arithmetic and phonology meet: The meta-analytic conver-  
728 gence of arithmetic and phonological processing in the brain. *Developmental cognitive*  
729 *neuroscience*. 2018;30:251–264.
- 730 [84] Krieger-Redwood K, Jefferies E, Karapanagiotidis T, Seymour R, Nunes A, Ang JWA,  
731 et al. Down but not out in posterior cingulate cortex: Deactivation yet functional  
732 coupling with prefrontal cortex during demanding semantic cognition. *Neuroimage*.  
733 2016;141:366–377.
- 734 [85] Ralph MAL, Jefferies E, Patterson K, Rogers TT. The neural and computational bases of  
735 semantic cognition. *Nature Reviews Neuroscience*. 2017;18(1):42–55.
- 736 [86] Clauset A, Shalizi CR, Newman ME. Power-law distributions in empirical data. *SIAM*  
737 *review*. 2009;51(4):661–703.
- 738 [87] Crossley NA, Mechelli A, Scott J, Carletti F, Fox PT, McGuire P, et al. The hubs of the  
739 human connectome are generally implicated in the anatomy of brain disorders. *Brain*.  
740 2014;137(8):2382–2395.
- 741 [88] Kantarci K, Murray ME, Schwarz CG, Reid RI, Przybelski SA, Lesnick T, et al. White-  
742 matter integrity on DTI and the pathologic staging of Alzheimer’s disease. *Neurobiology*  
743 *of aging*. 2017;56:172–179.
- 744 [89] Seehaus A, Roebroek A, Bastiani M, Fonseca L, Bratzke H, Lori N, et al. Histolog-  
745 ical validation of high-resolution DTI in human post mortem tissue. *Frontiers in Neu-*  
746 *roanatomy*. 2015;9:98.
- 747 [90] Pallast N, Wieters F, Nill M, Fink GR, Aswendt M. Graph theoretical quantification of  
748 white matter reorganization after cortical stroke in mice. *NeuroImage*. 2020:116873.
- 749 [91] Wang Y, Metoki A, Smith DV, Medaglia JD, Zang Y, Benear S, et al. Multimodal map-  
750 ping of the face connectome. *Nature Human Behaviour*. 2020;4(4):397–411.

- 751 [92] Lizarazu M, Gil-Robles S, Pomposo I, Nara S, Amoruso L, Quiñones I, et al. Spatiotem-  
752 poral dynamics of postoperative functional plasticity in patients with brain tumors in  
753 language areas. *Brain and Language*. 2020;202:104741.
- 754 [93] Medaglia JD, Lynall ME, Bassett DS. Cognitive network neuroscience. *Journal of cog-  
755 nitive neuroscience*. 2015.
- 756 [94] Sporns O. Contributions and challenges for network models in cognitive neuroscience.  
757 *Nature neuroscience*. 2014;17(5):652–660.
- 758 [95] Bassett DS, Zurn P, Gold JI. On the nature and use of models in network neuroscience.  
759 *Nature Reviews Neuroscience*. 2018.
- 760 [96] Donahue CJ, Sotiropoulos SN, Jbabdi S, Hernandez-Fernandez M, Behrens TE, Dyrby  
761 TB, et al. Using diffusion tractography to predict cortical connection strength and dis-  
762 tance: a quantitative comparison with tracers in the monkey. *Journal of Neuroscience*.  
763 2016;36(25):6758–6770.
- 764 [97] Salehi M, Greene AS, Karbasi A, Shen X, Scheinost D, Constable RT. There is no single  
765 functional atlas even for a single individual: Functional parcel definitions change with  
766 task. *NeuroImage*. 2020;208:116366.
- 767 [98] Botvinik-Nezer R, Iwanir R, Holzmeister F, Huber J, Johannesson M, Kirchler M, et al.  
768 fMRI data of mixed gambles from the Neuroimaging Analysis Replication and Prediction  
769 Study. *Scientific data*. 2019;6(1):1–9.
- 770 [99] Boukadi M, Marcotte K, Bedetti C, Houde JC, Desautels A, Deslauriers-Gauthier S, et al.  
771 Test-retest reliability of diffusion measures extracted along white matter language fiber  
772 bundles using HARDI-based tractography. *Frontiers in neuroscience*. 2019;12:1055.
- 773 [100] Caiazzo G, Fratello M, Di Nardo F, Trojsi F, Tedeschi G, Esposito F. Structural con-  
774 nectome with high angular resolution diffusion imaging MRI: assessing the impact  
775 of diffusion weighting and sampling on graph-theoretic measures. *Neuroradiology*.  
776 2018;60(5):497–504.
- 777 [101] Elliott ML, Knodt AR, Ireland D, Morris ML, Poulton R, Ramrakha S, et al. What Is  
778 the Test-Retest Reliability of Common Task-Functional MRI Measures? New Empirical  
779 Evidence and a Meta-Analysis. *Psychological Science*. 2020:0956797620916786.
- 780 [102] Reid LB, Cespedes MI, Pannek K. How many streamlines are required for reliable prob-  
781 abilistic tractography? Solutions for microstructural measurements and neurosurgical  
782 planning. *NeuroImage*. 2020;211:116646.

- 783 [103] Sinke MR, Otte WM, Christiaens D, Schmitt O, Leemans A, van der Toorn A, et al.  
784 Diffusion MRI-based cortical connectome reconstruction: dependency on tractogra-  
785 phy procedures and neuroanatomical characteristics. *Brain Structure and Function*.  
786 2018;223(5):2269–2285.

787 **Supplementary Table 1: FA marginal means for behavior in the whole brain**

| Behavior 1     | Behavior 2         | Lower CI | Mean Diff. | Upper CI | p      |
|----------------|--------------------|----------|------------|----------|--------|
| WAB            | Factor Sum         | 0.055    | 0.056      | 0.058    | <0.001 |
| WAB            | Lexical            | 0.006    | 0.007      | 0.009    | <0.001 |
| WAB            | Auditory Comp.     | 0.036    | 0.038      | 0.039    | <0.001 |
| WAB            | Phonology          | 0.06     | 0.062      | 0.063    | <0.001 |
| WAB            | Cognitive/Semantic | 0.103    | 0.104      | 0.106    | <0.001 |
| Factor Sum     | Lexical            | -0.05    | -0.049     | -0.047   | <0.001 |
| Factor Sum     | Auditory Comp.     | -0.02    | -0.019     | -0.017   | <0.001 |
| Factor Sum     | Phonology          | 0.004    | 0.005      | 0.007    | <0.001 |
| Factor Sum     | Cognitive/Semantic | 0.047    | 0.048      | 0.05     | <0.001 |
| Lexical        | Auditory Comp.     | 0.029    | 0.03       | 0.032    | <0.001 |
| Lexical        | Phonology          | 0.053    | 0.054      | 0.056    | <0.001 |
| Lexical        | Cognitive/Semantic | 0.096    | 0.097      | 0.099    | <0.001 |
| Auditory Comp. | Phonology          | 0.023    | 0.024      | 0.026    | <0.001 |
| Auditory Comp. | Cognitive/Semantic | 0.065    | 0.067      | 0.068    | <0.001 |
| Phonology      | Cognitive/Semantic | 0.041    | 0.043      | 0.044    | <0.001 |

788  
789  
790 **Supplementary Table 2: FA marginal means for behavior in the left hemisphere**

| Behavior 1     | Behavior 2         | Lower CI | Mean Diff. | Upper CI | p      |
|----------------|--------------------|----------|------------|----------|--------|
| WAB            | Factor Sum         | 0.075    | 0.078      | 0.08     | <0.001 |
| WAB            | Lexical            | 0.001    | 0.003      | 0.005    | 0.004  |
| WAB            | Auditory Comp.     | 0.01     | 0.012      | 0.014    | <0.001 |
| WAB            | Phonology          | 0.037    | 0.039      | 0.042    | <0.001 |
| WAB            | Cognitive/Semantic | 0.074    | 0.077      | 0.079    | <0.001 |
| Factor Sum     | Lexical            | -0.077   | -0.075     | -0.072   | <0.001 |
| Factor Sum     | Auditory Comp.     | -0.068   | -0.066     | -0.064   | <0.001 |
| Factor Sum     | Phonology          | -0.041   | -0.039     | -0.036   | <0.001 |
| Factor Sum     | Cognitive/Semantic | -0.004   | -0.001     | 0.001    | 0.632  |
| Lexical        | Auditory Comp.     | 0.007    | 0.009      | 0.011    | <0.001 |
| Lexical        | Phonology          | 0.034    | 0.036      | 0.039    | <0.001 |
| Lexical        | Cognitive/Semantic | 0.071    | 0.074      | 0.076    | <0.001 |
| Auditory Comp. | Phonology          | 0.025    | 0.027      | 0.03     | <0.001 |
| Auditory Comp. | Cognitive/Semantic | 0.062    | 0.065      | 0.067    | <0.001 |
| Phonology      | Cognitive/Semantic | 0.035    | 0.037      | 0.04     | <0.001 |

793 **Supplementary Table 3: Streamline marginal means for behavior in the whole brain**

| Behavior 1     | Behavior 2         | Lower CI | Mean Diff. | Upper CI | p      |
|----------------|--------------------|----------|------------|----------|--------|
| WAB            | Factor Sum         | 0.049    | 0.05       | 0.052    | <0.001 |
| WAB            | Lexical            | 0.003    | 0.005      | 0.006    | <0.001 |
| WAB            | Auditory Comp.     | 0.063    | 0.064      | 0.066    | <0.001 |
| WAB            | Phonology          | 0.04     | 0.041      | 0.043    | <0.001 |
| WAB            | Cognitive/Semantic | 0.095    | 0.096      | 0.098    | <0.001 |
| Factor Sum     | Lexical            | -0.047   | -0.045     | -0.044   | <0.001 |
| Factor Sum     | Auditory Comp.     | 0.013    | 0.014      | 0.016    | <0.001 |
| Factor Sum     | Phonology          | -0.01    | -0.009     | -0.007   | <0.001 |
| Factor Sum     | Cognitive/Semantic | 0.045    | 0.046      | 0.048    | <0.001 |
| Lexical        | Auditory Comp.     | 0.058    | 0.059      | 0.061    | <0.001 |
| Lexical        | Phonology          | 0.035    | 0.036      | 0.038    | <0.001 |
| Lexical        | Cognitive/Semantic | 0.09     | 0.091      | 0.093    | <0.001 |
| Auditory Comp. | Phonology          | -0.025   | -0.023     | -0.022   | <0.001 |
| Auditory Comp. | Cognitive/Semantic | 0.031    | 0.032      | 0.034    | <0.001 |
| Phonology      | Cognitive/Semantic | 0.054    | 0.055      | 0.057    | <0.001 |

796 **Supplementary Table 4: Streamline marginal means for behavior in the whole brain**

| Behavior 1     | Behavior 2         | Lower CI | Mean Diff. | Upper CI | p      |
|----------------|--------------------|----------|------------|----------|--------|
| WAB            | Factor Sum         | 0.049    | 0.05       | 0.052    | <0.001 |
| WAB            | Lexical            | 0.012    | 0.014      | 0.015    | <0.001 |
| WAB            | Auditory Comp.     | 0.021    | 0.022      | 0.024    | <0.001 |
| WAB            | Phonology          | 0.029    | 0.03       | 0.032    | <0.001 |
| WAB            | Cognitive/Semantic | 0.074    | 0.075      | 0.077    | <0.001 |
| Factor Sum     | Lexical            | -0.038   | -0.036     | -0.035   | <0.001 |
| Factor Sum     | Auditory Comp.     | -0.029   | -0.028     | -0.026   | <0.001 |
| Factor Sum     | Phonology          | -0.021   | -0.02      | -0.018   | <0.001 |
| Factor Sum     | Cognitive/Semantic | 0.024    | 0.025      | 0.027    | <0.001 |
| Lexical        | Auditory Comp.     | 0.007    | 0.008      | 0.01     | <0.001 |
| Lexical        | Phonology          | 0.015    | 0.016      | 0.018    | <0.001 |
| Lexical        | Cognitive/Semantic | 0.06     | 0.062      | 0.063    | <0.001 |
| Auditory Comp. | Phonology          | 0.006    | 0.008      | 0.01     | <0.001 |
| Auditory Comp. | Cognitive/Semantic | 0.052    | 0.053      | 0.055    | <0.001 |
| Phonology      | Cognitive/Semantic | 0.044    | 0.045      | 0.047    | <0.001 |



799 **Supplementary Table 5: Beta weights for each condition of the observed and simulated**  
 800 **regression models**

**Observed**

FA - Whole Brain

| Behavior           | Edge Weights | Modularity | Efficiency | Transitivity | SWP   |
|--------------------|--------------|------------|------------|--------------|-------|
| WAB-AQ             | 35.14        | -0.66      | -21.81     | -12.76       | -3.37 |
| Factor Sum         | 1.93         | 0.00       | -1.34      | -0.46        | -0.07 |
| Lexical            | 1.40         | -0.05      | -0.04      | -1.34        | -0.24 |
| Auditory Comp.     | 0.20         | 0.18       | -0.90      | 0.44         | 0.04  |
| Phonology          | 0.72         | -0.13      | -0.33      | -0.26        | 0.09  |
| Cognitive/Semantic | -0.38        | -0.01      | -0.07      | 0.70         | 0.04  |

FA - Left Hemisphere

| Behavior           | Edge Weights | Modularity | Efficiency | Transitivity | SWP   |
|--------------------|--------------|------------|------------|--------------|-------|
| WAB-AQ             | 26.62        | 2.11       | -18.51     | -3.81        | -3.55 |
| Factor Sum         | 0.84         | -0.05      | -0.66      | 0.07         | -0.05 |
| Lexical            | 0.96         | 0.02       | -0.01      | -0.75        | 0.04  |
| Auditory Comp.     | -0.45        | -0.33      | 0.01       | 0.13         | -0.10 |
| Phonology          | 0.64         | 0.18       | -0.26      | -0.30        | -0.39 |
| Cognitive/Semantic | -0.30        | 0.08       | -0.39      | 0.98         | 0.39  |

Streamline - Whole Brain

| Behavior           | Edge Weights | Modularity | Efficiency | Transitivity | SWP   |
|--------------------|--------------|------------|------------|--------------|-------|
| WAB-AQ             | 5.64         | -4.70      | 1.59       | 4.41         | 1.75  |
| Factor Sum         | 0.08         | -0.39      | 0.21       | 0.28         | 0.10  |
| Lexical            | 0.34         | -0.27      | -0.07      | -0.18        | -0.08 |
| Auditory Comp.     | 0.01         | 0.18       | -0.19      | 0.18         | -0.04 |
| Phonology          | -0.40        | -0.20      | 0.79       | 0.56         | 0.16  |
| Cognitive/Semantic | 0.14         | -0.11      | -0.31      | -0.28        | 0.06  |

Streamline – Left Hemisphere

| Behavior           | Edge Weights | Modularity | Efficiency | Transitivity | SWP   |
|--------------------|--------------|------------|------------|--------------|-------|
| WAB-AQ             | 5.41         | -2.98      | 0.39       | 2.39         | 0.22  |
| Factor Sum         | -0.76        | -0.46      | 0.69       | 0.25         | -0.33 |
| Lexical            | 0.66         | -0.08      | -0.18      | -0.32        | 0.10  |
| Auditory Comp.     | -0.20        | -0.39      | -0.13      | -0.01        | 0.02  |
| Phonology          | -0.76        | -0.02      | 0.80       | 0.60         | -0.17 |
| Cognitive/Semantic | -0.45        | 0.03       | 0.19       | -0.02        | -0.27 |

**Simulated**

FA - Whole Brain

| Behavior           | Edge Weights | Modularity | Efficiency | Transitivity | SWP   |
|--------------------|--------------|------------|------------|--------------|-------|
| WAB-AQ             | 7.34         | -2.58      | -5.69      | 2.88         | -3.67 |
| Factor Sum         | 0.52         | -0.14      | -0.42      | 0.06         | -0.14 |
| Lexical            | 0.42         | -0.13      | -0.17      | -0.08        | -0.19 |
| Auditory Comp.     | 0.43         | 0.07       | -0.60      | -0.06        | 0.18  |
| Phonology          | -0.81        | -0.16      | 0.78       | 0.47         | -0.19 |
| Cognitive/Semantic | 0.48         | 0.07       | -0.43      | -0.27        | 0.06  |

FA - Left Hemisphere

| Behavior           | Edge Weights | Modularity | Efficiency | Transitivity | SWP   |
|--------------------|--------------|------------|------------|--------------|-------|
| WAB-AQ             | 15.44        | 5.15       | -9.94      | 2.63         | -1.47 |
| Factor Sum         | 0.52         | 0.12       | -0.34      | 0.14         | -0.03 |
| Lexical            | 0.45         | 0.18       | -0.11      | 0.03         | 0.14  |
| Auditory Comp.     | 0.06         | -0.25      | -0.30      | -0.06        | -0.08 |
| Phonology          | 0.28         | 0.06       | -0.07      | -0.04        | -0.29 |
| Cognitive/Semantic | -0.27        | 0.13       | 0.14       | 0.22         | 0.20  |

Streamline - Whole Brain

| Behavior           | Edge Weights | Modularity | Efficiency | Transitivity | SWP   |
|--------------------|--------------|------------|------------|--------------|-------|
| WAB-AQ             | 3.85         | -4.99      | 4.10       | 6.30         | 1.72  |
| Factor Sum         | 0.00         | -0.41      | 0.33       | 0.37         | 0.11  |
| Lexical            | 0.31         | -0.26      | -0.05      | -0.15        | -0.09 |
| Auditory Comp.     | -0.15        | 0.14       | 0.02       | 0.31         | -0.04 |
| Phonology          | -0.38        | -0.20      | 0.80       | 0.58         | 0.17  |
| Cognitive/Semantic | 0.22         | -0.09      | -0.45      | -0.37        | 0.06  |

Streamline - Whole Brain

| Behavior           | Edge Weights | Modularity | Efficiency | Transitivity | SWP   |
|--------------------|--------------|------------|------------|--------------|-------|
| WAB-AQ             | 5.07         | -2.85      | 0.72       | 2.72         | 0.10  |
| Factor Sum         | -0.79        | -0.46      | 0.72       | 0.27         | -0.33 |
| Lexical            | 0.53         | -0.10      | -0.08      | -0.28        | 0.03  |
| Auditory Comp.     | -0.18        | -0.39      | -0.14      | 0.00         | 0.04  |
| Phonology          | -0.77        | -0.02      | 0.82       | 0.60         | -0.18 |
| Cognitive/Semantic | -0.37        | 0.04       | 0.13       | -0.05        | -0.23 |

801

802 *Note:* Beta weights for the simulated models are the means from the simulated permutations.  
 803 The betas for the WAB-AQ represent the relationship between standardized network measures  
 804 and raw WAB-AQ values to aid interpretability. The betas for all other measures are between  
 805 standardized network measures and the factor scores.

806
